# Supplementary material
Source: publisher figshare collection journal article supplement (https://gsajournals.figshare.com/ndownloader/files/18726515)
Supplement: Supplementary file 1 [file 18726515]

## Sheet: Sheet1
Supplemental Table 2: Complete list of QTL recovered from two subpopulations and associated metrics
Category	Trait	Abbreviated Trait Name¹	LG	Chr²	QTL name³	Population	Marker interval	Peak position (cM)	Peak marker⁴	Range (cM)⁵	Range (Genomic)	Peak (Genomic)	Number of candidate genes	LOD	LOD threshold	1 LOD interval	Additive (a) effect⁶	Dominance (d) effect	|d/a|⁷	Gene action⁸	R²(%)⁹	Parental additive effect¹⁰	Number of individuals ¹¹	QTL cluster¹²	QTL hotspot¹³	Coincident QTL¹⁴
Fiber color	mean a*	Ca	AZ5	A06	qCa-AZ5-1	Arizona	GS1A_19003p436q20-EST1A_111998	6.72	GS1A_14865p560q19	0.01-16.83	11,844,977-56,018,324	17155477	523	90.69	3.72	4.69-7.72	-2.27	0.15	0.07	A	75.47	Tx2094	244	Cluster 1	Hotspot 2	Yes
Fiber color	mean a*	Ca	IA6	A06	qCa-IA6-1	Iowa	GS1A_14865p560q19-c4_48216	1.01	GS1A_14865p560q19	0.01-13.14	17,155,477-15,303,816	17155477	65	66.58	4.07	0.01-2.01	7.63	-1.63	0.21	PD	75.4	Acala Maxxa	226	Cluster 1	Hotspot 2	Yes
Fiber color	mean a*	Ca	AZ23	A08	qCa-AZ23-1	Arizona	c4_21262-c4_44618	46.67	GS2D_28817p642q3	31.91-56.5	101,773,196-117,527,721	116767583	604	25.47	3.72	43.67-50.39	-0.87	0.02	0.02	A	12.93	Tx2094	244		Hotspot 3	Yes
Fiber color	mean a*	Ca	IA19	A08	qCa-IA19-1	Iowa	c4_29690-c4_21262	20.64	GS2D_28817p642q3	10.64-34.25	110,712,136-101,773,196	116767583	294	7.4	4.07	15.64-28.8	2.01	-0.54	0.27	PD	5.12	Acala Maxxa	226	Cluster 5	Hotspot 3	Yes
Fiber color	mean b*	Cb	AZ5	A06	qCb-AZ5-1	Arizona	GS1A_19003p436q20-EST1A_111998	6.72	GS1A_14865p560q19	0.01-16.83	11,844,977-56,018,324	17155477	523	99.53	5	5.69-7.72	-5.22	1.22	0.23	PD	79.89	Tx2094	244	Cluster 1	Hotspot 2	Yes
Fiber color	mean b*	Cb	IA6	A06	qCb-IA6-1	Iowa	GS1A_14865p560q19-c4_48216	1.01	GS1A_14865p560q19	0.01-13.14	17,155,477-15,303,816	17155477	65	55.9	5.06	0.01-2.01	-2.23	0.45	0.2	PD	43.81	Tx2094	226	Cluster 1	Hotspot 2	Yes
Fiber color	mean b*	Cb	AZ23	A08	qCb-AZ23-1	Arizona	c4_21262-c4_44618	47.67	GS2D_28817p642q3	31.91-56.5	101,773,196-117,527,721	116767583	604	18.4	5	43.67-52.39	-1.5	0.28	0.18	A	8.13	Tx2094	244		Hotspot 3	Yes
Fiber color	mean b*	Cb	IA19	A08	qCb-IA19-1	Iowa	c4_29690-c4_21262	22.8	GS2D_28817p642q3	9.64-34.25	110,712,136-101,773,196	116767583	294	10.86	5.06	17.64-27.8	-0.65	0.08	0.12	A	6.39	Tx2094	226	Cluster 5	Hotspot 3	Yes
Fiber color	mean L*	CL	AZ5	A06	qCL-AZ5-1	Arizona	GS1A_19003p436q20-EST1A_111998	6.72	GS1A_14865p560q19	0.01-16.83	11,844,977-56,018,324	17155477	523	59.81	3.74	5.72-8.72	6.76	-0.39	0.06	A	65.2	Acala Maxxa	244	Cluster 1	Hotspot 2	No
Fiber color	mean L*	CL	IA22	A07	qCL-IA22-1	Iowa	c4_04889-c4_10256	63.62	c4_49169	61.62-68.17	80,660,496-72,792,542	88161608	78	4.46	3.94	60.48-69.75	-0.01	-0.03	1.86	OD	9.8	Tx2094	226	Cluster 6		No
Fiber color	mean L*	CL	AZ23	A08	qCL-AZ23-1	Arizona	c4_21262-c4_44618	47.67	GS2D_28817p642q3	31.91-56.5	101,773,196-117,527,721	116767583	604	14.98	3.74	42.67-52.39	2.55	0.15	0.06	A	11.44	Acala Maxxa	244		Hotspot 3	No
Fiber color	mean L*	CL	IA20	D07	qCL-IA20-1	Iowa	ck_75214-GS2A_20396p609q3	26.29	ck_75214	23.29-38.29	18,304,091-18,817,828	18304091	14	5	3.94	22.66-37.29	-0.03	0	0.07	A	12.28	Tx2094	226	Cluster 2		No
Fiber color	mean L*	CL	AZ2	D12	qCL-AZ2-1	Arizona	ck_02331-EST1D_27871_01	20.31	c4_23726	16.03-24.28	45,583,702-53,411,834	50419729	431	4.9	3.74	15.03-21.28	1.71	0.52	0.31	PD	2.72	Acala Maxxa	244			No
Fiber length	Mean Length by Number (Ln; in)	Ln	IA22	A07	qLn-IA22-1	Iowa	c4_10256-ck_53995	71.37	c4_32659	70.75-72.37	72,792,542-85,891,142	24309913	151	3.95	3.82	66.17-74.38	-0.03	0	0.06	A	9.08	Tx2094	187	Cluster 6	Hotspot 7	No
Fiber length	Mean Length by Number (Ln; in)	Ln	AZ14	D04	qLn-AZ14-1	Arizona	EST1D_03860-c4_07376	80.59	c4_25634	71.47-84.19	6,370,303-4,628,961	3602330	105	4.4	3.77	69.26-83.59	-0.03	-0.01	0.33	PD	10.93	Tx2094	190	Cluster 10	Hotspot 5	No
Fiber length	Mean Length by Number (Ln; in)	Ln	AZ9	D08	qLn-AZ9-1	Arizona	c3_00986-c2_51863	58.55	ck_45985	57.55-62.02	62,160,285-67,122,545	62908549	364	3.87	3.77	49.86-70.02	-0.03	0	0.14	A	7.91	Tx2094	190			No
Fiber length	Mean Length by Number (Ln; in)	Ln	AZ26	D13	qLn-AZ26-1	Arizona	EST1D_01778-c4_63317	1.25	c4_11191	1.01-8.73	8,757,166-52,788,761	11655805	944	4.08	3.77	0.01-12.73	0.02	0.02	1.24	OD	7.96	Acala Maxxa	190	Cluster 11	Hotspot 6	No
Fiber length	Coefficient of Variation of the Length by Number (LnCV; %)	LnCV	IA20	D07	qLnCV-IA20-1	Iowa	ck_75214-GS2A_20396p609q3	28.29	ck_75214	24.29-39.6	18,304,091-18,817,828	18304091	14	4.49	4	22.66-39.29	2.65	1.65	0.62	PD	10.43	Acala Maxxa	186	Cluster 2		No
Fiber length	Coefficient of Variation of the Length by Number (LnCV; %)	LnCV	IA30	D10	qLnCV-IA30-1	Iowa	ck_51389-c4_38839	26.55	c4_68073	23.32-32.73	37,165,699-22,991,955	13976894	261	5.15	4	23.32-31.73	2.34	-2.69	1.15	D	11.51	Acala Maxxa	186	Cluster 9		No
Fiber length	Coefficient of Variation of the Length by Number (LnCV; %)	LnCV	AZ2	D12	qLnCV-AZ2-1	Arizona	ck_02331-EST1D_27871_01	20.31	c4_23726	19.03-21.28	45,583,702-53,411,834	50419729	431	4.02	3.75	16.03-21.28	3.9	0.26	0.07	A	9.46	Acala Maxxa	189			No
Fiber length	Mean Length by Weight (Lw; in)	Lw	IA32	A04	qLw-IA32-1	Iowa	c4_28198-EST1A_21911	28.31	c4_57783	25.9-32.31	40,696,893-807,278*	16201244	538	4.19	3.93	21.8-35.31	0.03	-0.02	0.5	PD	7.8	Acala Maxxa	187			No
Fiber length	Mean Length by Weight (Lw; in)	Lw	AZ5	A06	qLw-AZ5-1	Arizona	GS1A_19003p436q20-EST1A_111998	5.72	GS1A_14865p560q19	0.01-16.83	11,844,977-56,018,324	17155477	523	6.23	3.73	1.73-11.72	0.03	0.02	0.68	PD	11.66	Acala Maxxa	190	Cluster 1	Hotspot 1	No
Fiber length	Mean Length by Weight (Lw; in)	Lw	IA22	A07	qLw-IA22-1	Iowa	c4_49169-cs_1083	69.75	c4_10256	66.17-84.27	88,161,608-20,614,871	72792542	852	5.43	3.93	66.17-82.27	-0.03	0	0.03	A	10.79	Tx2094	187	Cluster 6	Hotspot 7	No
Fiber length	Mean Length by Weight (Lw; in)	Lw	AZ13	D01	qLw-AZ13-1	Arizona	EST1D_12_476-c4_21328	6.27	c2_114573	0.01-22.18	18,992,271*-62,287,774	18196452	964	6.01	3.73	0.82-16.18	-0.03	0	0.09	A	9.96	Tx2094	190	Cluster 7	Hotspot 4	No
Fiber length	Mean Length by Weight (Lw; in)	Lw	AZ14	D04	qLw-AZ14-1	Arizona	cs_12499-c4_07376	71.47	EST1D_03860	65.26-84.19	34,198,635-4,628,961	6370303	697	5.19	3.73	65.26-80.59	-0.03	0	0.19	A	9.47	Tx2094	190	Cluster 10	Hotspot 5	Yes
Fiber length	Mean Length by Weight (Lw; in)	Lw	IA14	D04	qLw-IA14-1	Iowa	c4_25634-c4_00820	12.21	cs_173	10.61-15.22	3,602,330-12,443,194	39704855	433	4.94	3.93	9.61-15.22	-0.03	0.01	0.28	PD	9.85	Tx2094	187	Cluster 10	Hotspot 5	Yes
Fiber length	Mean Length by Weight (Lw; in)	Lw	AZ9	D08	qLw-AZ9-1	Arizona	c4_56022-c2_51863	55.86	c3_00986	35.15-71.02	40,732,098-67,122,545	62160285	1208	5.33	3.73	49.86-68.02	-0.03	0.01	0.21	PD	8.77	Tx2094	190			No
Fiber length	Mean Length by Weight (Lw; in)	Lw	IA25	D11	qLw-IA25-1	Iowa	c4_41050-c3_11416	55.76	GS2D_41103p205q20	50.76-65.61	51,433,613-50,841,706	20781578	15	5.28	3.93	50.76-63.61	0.04	0	0.08	A	11.1	Acala Maxxa	187			No
Fiber length	Mean Length by Weight (Lw; in)	Lw	AZ26	D13	qLw-AZ26-1	Arizona	c4_63317-c2_58393	19.68	c4_43125	12.84-23.68	52,788,761-58,115,513	58413467	267	5.29	3.73	12.73-22.78	0.03	0.01	0.37	PD	8.97	Acala Maxxa	190	Cluster 11	Hotspot 6	No
Fiber length	2.5% Length by Number (L25n; %; in)	L25n	AZ13	D01	qL25n-AZ13-1	Arizona	EST1D_12_476-c4_21328	0.01	EST1D_12_476	0.01-14.18	18,992,271*-62,287,774	Unknown	964	5.33	3.72	0.01-9.13	-0.04	0.04	0.98	D	14.26	Tx2094	120	Cluster 7	Hotspot 4	No
Fiber length	2.5% Length by Number (L25n; %; in)	L25n	AZ26	D13	qL25n-AZ26-1	Arizona	c4_18034-c2_58393	19.68	c4_43125	2.86-23.68	17,722,699-58,115,513	58413467	967	3.88	3.72	1.01-22.78	0.05	0	0.08	A	10.76	Acala Maxxa	120	Cluster 11	Hotspot 6	No
Fiber length	5% Length by Number (L5n; %; in)	L5n	AZ5	A06	qL5n-AZ5-1	Arizona	GS1A_19003p436q20-EST1A_116921	5.72	GS1A_14865p560q19	0.01-14.72	11,844,977-42,832,727	17155477	438	6.36	3.68	1.73-11.72	0.03	0.04	1.06	D	12.14	Acala Maxxa	189	Cluster 1	Hotspot 1	No
Fiber length	5% Length by Number (L5n; %; in)	L5n	AZ13	D01	qL5n-AZ13-1	Arizona	EST1D_12_476-c4_21328	7.27	c2_114573	0.01-22.18	18,992,271*-62,287,774	18196452	964	8.39	3.68	3.27-9.13	-0.05	0	0.05	A	14.27	Tx2094	189	Cluster 7	Hotspot 4	No
Fiber length	5% Length by Number (L5n; %; in)	L5n	AZ14	D04	qL5n-AZ14-1	Arizona	c4_12071-c4_25634	55.51	c2_14014	55.08-69.47	45,724,046-3,602,330	12364699	1064	4.53	3.68	54.08-60.42	-0.03	-0.02	0.53	PD	7.24	Tx2094	189	Cluster 10	Hotspot 5	No
Fiber length	5% Length by Number (L5n; %; in)	L5n	IA20	D07	qL5n-IA20-1	Iowa	ck_75214-GS2A_20396p609q3	28.29	ck_75214	23.29-39.6	18,304,091-18,817,828	18304091	14	4.49	3.83	22.66-39.29	2.65	1.65	0.62	PD	10.43	Acala Maxxa	187	Cluster 2		No
Fiber length	5% Length by Number (L5n; %; in)	L5n	AZ9	D08	qL5n-AZ9-1	Arizona	EST2_18036_01-c4_56022	22.35	GS1D_51879p342q31	16.01-29.8	2,309,559-40,732,098	5025252	973	4.67	3.68	14.01-29.8	-0.03	0.01	0.37	PD	8.09	Tx2094	189	Cluster 8		No
Fiber length	5% Length by Number (L5n; %; in)	L5n	IA30	D10	qL5n-IA30-1	Iowa	ck_51389-c4_38839	26.55	c4_68073	23.32-32.73	37,165,699-22,991,955	13976894	261	5.15	3.83	23.32-31.73	2.34	-2.69	1.15	D	11.51	Acala Maxxa	187	Cluster 9		No
Fiber length	5% Length by Number (L5n; %; in)	L5n	AZ7	D11	qL5n-AZ7-1	Arizona	GS1D_16639p444q33-c4_13985	67.78	c4_00602	62.74-83.37	62,089,900-10,421,827	37874929	1678	4.14	3.68	58.74-83.37	0.03	0.01	0.19	A	7.32	Acala Maxxa	189			No
Fiber length	Upper Quantile Length by Weight (UQLw; in)	UQLw	IA34	A05	qUQLw-IA34-1	Iowa	EST1A_04360-c4_36190	26.03	EST1A_04360	25.03-28.03	16,799,827-12,447,798	16799827	416	3.96	3.8	22.03-30.03	0.02	0.04	1.76	OD	7.91	Acala Maxxa	187			No
Fiber length	Upper Quantile Length by Weight (UQLw; in)	UQLw	AZ5	A06	qUQLw-AZ5-1	Arizona	GS1A_19003p436q20-EST1A_116921	6.72	GS1A_14865p560q19	0.01-14.72	11,844,977-42,832,727	17155477	438	5.54	3.66	1.73-12.72	0.03	0.03	1.03	D	12.13	Acala Maxxa	189	Cluster 1	Hotspot 1	No
Fiber length	Upper Quantile Length by Weight (UQLw; in)	UQLw	IA22	A07	qUQLw-IA22-1	Iowa	c4_49169-cs_1083	70.75	c4_32659	67.17-80.27	88,161,608-20,614,871	24309913	852	4.78	3.8	66.17-80.27	-0.04	-0.01	0.18	A	8.97	Tx2094	187	Cluster 6	Hotspot 7	No
Fiber length	Upper Quantile Length by Weight (UQLw; in)	UQLw	AZ13	D01	qUQLw-AZ13-1	Arizona	EST1D_12_476-c4_21328	6.27	c2_114573	0.01-16.18	18,992,271*-62,287,774	18196452	964	5.77	3.66	0.82-9.13	-0.04	0	0.1	A	10.82	Tx2094	189	Cluster 7	Hotspot 4	No
Fiber length	Upper Quantile Length by Weight (UQLw; in)	UQLw	IA14	D04	qUQLw-IA14-1	Iowa	EST1D_03860-c4_00820	0.01	EST1D_03860	0.01-12.21	6,370,303-12,443,194	6370303	253	5.81	3.8	0.01-3.01	-0.03	0.04	1.25	OD	9.34	Tx2094	187	Cluster 10	Hotspot 5	No
Fiber length	Upper Quantile Length by Weight (UQLw; in)	UQLw	AZ12	D05	qUQLw-AZ12-1	Arizona	c2_04598-c4_131801	125.4	c4_09461	113.44-136.4	14,681,025-2,523,538	9093352	1349	4.71	3.66	113.44-135.4	-0.03	0.05	1.54	OD	17.51	Tx2094	189			No
Fiber length	Upper Quantile Length by Weight (UQLw; in)	UQLw	AZ9	D08	qUQLw-AZ9-1	Arizona	ck_03436-c2_04080	22.35	GS1D_51879p342q31	16.71-28.35	4,206,266-13,256,767	5025252	432	4.37	3.66	14.01-28.8	-0.03	0.01	0.49	PD	7.52	Tx2094	189	Cluster 8		No
Fiber length	Upper Quantile Length by Weight (UQLw; in)	UQLw	IA25	D11	qUQLw-IA25-1	Iowa	c4_41050-c3_11416	54.76	GS2D_41103p205q20	49.76-64.61	51,433,613-50,841,706	20781578	15	6.14	3.8	50.76-60.61	0.05	-0.01	0.29	PD	13.61	Acala Maxxa	187			No
Other fiber qualities	Fineness (Fine; mTex)	Fine	IA23	D09	qFine-IA23-1	Iowa	c3_66591-c4_101926	53.97	c4_51260	53.97-55.73	35,133,574-38,621,634	12451928	214	4.13	3.92	51.97-56.91	-1.5	-2.56	1.71	OD	14.59	Tx2094	187			No
Other fiber qualities	Fineness (Fine; mTex)	Fine	AZ26	D13	qFine-AZ26-1	Arizona	c4_00395-c4_63317	6.49	c4_00395	5.49-11.73	36,334,366-52,788,761	36334366	464	3.94	3.6	0.01-16.68	-5.26	2.56	0.49	PD	7.42	Tx2094	190	Cluster 11		No
Other fiber qualities	Maturity Ratio (MR)	MR	IA22	A07	qMR-IA22-1	Iowa	GS1A_20202p545q14-c4_32659	67.17	c4_10256	55.08-68.75	92,795,490-24,309,913	72792542	1020	4.13	3.89	49.08-68.75	0.66	1.45	2.18	OD	12.84	Acala Maxxa	187	Cluster 6		No
Other fiber qualities	Nep Size (NS, μm)	NS	IA15	A10	qNS-IA15-1	Iowa	c4_30426-c3_35478	8.49	c4_28291	8.49-10.17	6,566,496-80,806,711	70245846	916	3.98	3.69	6.49-12.17	-3.05	11.25	3.68	OD	9.9	Tx2094	179			No
Other fiber qualities	Short Fiber Content by Number (SFCn; %)	SFCn	IA20	D07	qSFCn-IA20-1	Iowa	ck_75214-GS2A_20396p609q3	29.29	ck_75214	24.29-39.6	18,304,091-18,817,828	18304091	14	4.62	3.95	22.66-39.29	2.64	1.6	0.61	PD	10.77	Acala Maxxa	186	Cluster 2		No
Other fiber qualities	Short Fiber Content by Number (SFCn; %)	SFCn	IA30	D10	qSFCn-IA30-1	Iowa	GS1_11360p399q15-c4_38839	27.76	c4_68073	26.55-31.73	21,883,853-22,991,955	13976894	43	4.32	3.95	23.32-34.73	2.36	-2.01	0.85	D	9.9	Acala Maxxa	186	Cluster 9		No
Other fiber qualities	Trash Size (TrS; μm)	TrS	AZ15	A11	qTrS-AZ15-1	Arizona	EST1A_22580-c4_110219	45.12	EST1A_22580	45.12-45.97	66,564,698*-94,722,588	Unknown	224	3.92	3.66	44.33-45.97	13.5	15.9	1.18	D	9.8	Acala Maxxa	132			No
Other fiber qualities	Trash Size (TrS; μm)	TrS	AZ12	D05	qTrS-AZ12-1	Arizona	EST2D_20572-GS1D_23044p418q14	92.71	c4_06690	87.33-98.71	21,529,953-15,583,214	18861200	575	5.11	3.66	88.33-97.71	19.84	-7.19	0.36	PD	14.06	Acala Maxxa	132			No
Flower	Average Stigma Distance (SD, mm)	SD	AZ33	A04	qSD-AZ33-1	Arizona	c2_14224-c4_57783	6.45	c4_06113	1.45-9.92	72,453,289-16,201,244	48679431	440	3.91	3.63	0.01-15.87	-1.03	-0.08	0.07	A	6.62	Tx2094	252			No
Flower	Average Stigma Distance (SD, mm)	SD	AZ6	A05	qSD-AZ6-1	Arizona	c3_40633-c2_31256	14.62	cs_1021	10.83-15.62	93,933,072-82,328,431	71772757	342	4.34	3.63	7.83-15.62	1.08	-0.37	0.34	PD	7.29	Acala Maxxa	252	Cluster 3		No
Flower	Average Stigma Distance (SD, mm)	SD	IA19	A08	qSD-IA19-1	Iowa	c4_29690-c2_02349	21.8	GS2D_28817p642q3	19.64-29.8	110,712,136-101,773,196*	116767583	294	4.54	3.7	17.64-30.8	-1.35	0.36	0.27	PD	7.89	Tx2094	229	Cluster 5		No
Flower	Average Stigma Distance (SD, mm)	SD	IA25	D11	qSD-IA25-1	Iowa	ck_36210-GS2D_55913p499q20	98.42	GS2D_55913p499q20	95.42-102.42	62,089,900*-70,026,154	70026154	436	3.88	3.7	89.42-108.85	-1.35	0.7	0.52	PD	7.59	Tx2094	229			No
Flower	Curly Style (CS; Presence '1' /Absence '0')	CS	IA5	A09	qCS-IA5-1	Iowa	c3_37342-c4_53534	24.71	c4_38063	23.71-25.19	62,042,708-62,620,990	64760080	17	2.52	2.5	19.71-31.19	-0.08	-0.14	1.85	OD	4.61	Tx2094	226			No
Flower	Curly Style (CS; Presence '1' /Absence '0')	CS	IA1	A12	qCS-IA1-1	Iowa	c3_76188-GS2A_37259p664q5	2.91	GS2D_22731p558q11	0.01-3.91	13,521,801-89,388,596	78273367	1103	8.2	2.5	0.01-3.91	-0.26	-0.22	0.85	D	25.99	Tx2094	226			No
Flower	Curly Style (CS; Presence '1' /Absence '0')	CS	IA29	D05	qCS-IA29-1	Iowa	EST1D_23510_01-GS2D_51331p736q38	3.01	EST1D_23510_01	3.01-4.04	27,776,136-26,606,552	27776136	78	30.54	2.5	2.01-4.01	0.41	-0.54	1.31	OD	64.96	Acala Maxxa	226			No
Flower	Curly Style (CS; Presence '1' /Absence '0')	CS	IA37	D12	qCS-IA37-1	Iowa	c4_41113-GS2A_7310p1793q4A	0.01	c4_41113	0.01-1.01	61,838,133-101,355,435	61838133	216	36.03	2.5	0.01-1.01	-0.43	-0.55	1.28	OD	66.09	Tx2094	226			No
Flower	Petal Spot (PS; Presence '1'/Absence '0')	PS	AZ16	A07	qPS-AZ16-1	Arizona	EST2_39330-c4_00014	26.01	EST2_39330	26.01-42.61	80,660,496*-1,830,647	20,614,871*	1674	62.23	30.28	25.72-26.51	-0.38	0.51	1.33	OD	41.4	Tx2094	252			Yes
Flower	Petal Spot (PS; Presence '1'/Absence '0')	PS	IA22	A07	qPS-IA22-1	Iowa	c2_11322-GS1A_23155p1125q16	93.82	c2_11322	93.82-94.82	18,377,612-7,321,899	18377612	466	37.42	21.68	93.54-94.82	-0.38	0.33	0.87	D	53.58	Tx2094	226			Yes
Flower	Pollen Color (PC; Yellow '1'/Cream '0')	PC	AZ6	A05	qPC-AZ6-1	Arizona	c2_48932-c2_31256	0.01	c2_48932	0.01-14.62	93,492,954-82,328,431	93492954	333	6.2	2.25	0.01-6.83	-0.1	0.07	0.71	PD	9.47	Tx2094	252	Cluster 3		Yes
Flower	Pollen Color (PC; Yellow '1'/Cream '0')	PC	IA16	A05	qPC-IA16-1	Iowa	c2_114307-c2_48932	36.07	GS2A_48587p409q3	21.26-37.12	82,328,431*-93,492,954	32455072	333	8.13	2.82	32.07-37.07	-0.11	0.11	1.02	D	13.82	Tx2094	224			Yes
Flower	Pollen Color (PC; Yellow '1'/Cream '0')	PC	IA15	A10	qPC-IA15-1	Iowa	c4_30426-c4_28291	5.49	c4_30426	5.49-6.49	6,566,496-70,245,846	6566496	757	2.95	2.82	4.81-7.49	-0.05	0.07	1.28	OD	4.55	Tx2094	224			No
Flower	Pollen Color (PC; Yellow '1'/Cream '0')	PC	AZ14	D04	qPC-AZ14-2	Arizona	cs_12499-c4_07376	80.59	c4_25634	61.26-84.19	34,198,635-4,628,961	3602330	697	11.48	2.25	71.47-83.59	-0.12	0.14	1.13	D	20.11	Tx2094	252	Cluster 10		Yes
Flower	Pollen Color (PC; Yellow '1'/Cream '0')	PC	IA14	D04	qPC-IA14-1	Iowa	EST1D_03860-c4_00820	10.61	cs_173	0.01-16.22	6,370,303-12,443,194	39704855	253	7.73	2.82	6.58-13.21	-0.1	0.13	1.28	OD	13.9	Tx2094	224	Cluster 10		Yes
Flower	Pollen Color (PC; Yellow '1'/Cream '0')	PC	AZ14	D04	qPC-AZ14-1	Arizona	c4_02071-c2_50716	37.1	c2_50716	32.1-43.1	54,098,933-46,078,779*	Unknown	431	2.77	2.25	28.1-52.4	-0.1	0.1	0.99	D	10.58	Tx2094	252			No
Flower	Pollen Color (PC; Yellow '1'/Cream '0')	PC	AZ12	D05	qPC-AZ12-1	Arizona	EST1D_23510_01-EST1D_140374	64.94	GS2D_51331p736q38	60.62-70.94	27,776,136-21,529,953*	26606552	450	2.75	2.25	58.56-81.68	-0.09	0.06	0.64	PD	6.94	Tx2094	252			No
Fruiting habit	Total Number of Nodes to First Fruiting Branch (NF)	NF	AZ7	D11	qNF-AZ7-1	Arizona	c4_18678-c4_38231	101.27	c4_13985	85.37-104.8	16,210,907-7,839,868	10421827	659	7.53	4.1	94.37-104.27	-1.09	-0.76	0.7	PD	34.95	Tx2094	249			No
Fruiting habit	Plant Height-to-Total Number of Nodes Ratio (PHTN)	PHTN	AZ30	A01	qPHTN-AZ30-1	Arizona	c4_73990-EST1A_32413_01	29.97	c4_10335	24.97-34.21	91,683,592-12,467,101	17216853	872	4.05	3.54	22.37-36.21	2.5	1.26	0.5	PD	7.14	Acala Maxxa	250	Cluster 4		No
Fruiting habit	Plant Height-to-Total Number of Nodes Ratio (PHTN)	PHTN	IA18	A11	qPHTN-IA18-1	Iowa	c4_26580-cs_1288	45.42	c4_26580	43.42-45.82	10,951,928-12,955,059	10951928	121	4.31	3.83	39.42-45.42	2.68	0.07	0.02	A	7.54	Acala Maxxa	227			No
Fruiting habit	Plant Height-to-Total Number of Nodes Ratio (PHTN)	PHTN	AZ21	D07	qPHTN-AZ21-1	Arizona	c4_46170-ck_75214	9.95	GS1_41582p272q16	0.01-18.15	48,192,327-18,304,091	28617210	674	6.85	3.54	5.41-13.24	-3.41	-0.62	0.18	A	11.69	Tx2094	250			No
Fruiting habit	Total Number of Nodes (TN)	TN	AZ30	A01	qTN-AZ30-1	Arizona	c4_78149-EST1A_32413_01	22.2	c2_38857	0.01-32.21	100,276,588-12,467,101	65148434	1219	8.68	3.59	18.47-26.97	-2.28	-0.97	0.42	PD	12.68	Tx2094	252	Cluster 4		No
Fruiting habit	Total Number of Nodes (TN)	TN	AZ6	A05	qTN-AZ6-1	Arizona	cs_1021-GS2A_48587p409q3	24.25	c4_17535	14.62-29.25	71,772,757-32,455,072	38030203	497	4.24	3.59	18.9-30.25	-0.58	2.01	3.49	OD	5.97	Tx2094	252	Cluster 3		No
Fruiting habit	Total Number of Nodes (TN)	TN	IA2	A12	qTN-IA2-1	Iowa	EST1A_00152-c4_13563	17.36	c4_49399	8.36-25.7	72,842,063-3,183,212	7834354	797	4.55	3.82	5.36-27.7	-1.4	1.97	1.41	OD	14.07	Tx2094	227			No
Fruiting habit	Total Number of Nodes (TN)	TN	AZ20	D09	qTN-AZ20-1	Arizona	c2_03579-EST1D_30997_01_542	48.12	c2_03579	48.12-52.75	3,971,337-2,151,800	3971337	71	4.04	3.59	46.32-55.67	1.51	0.25	0.16	A	5.74	Acala Maxxa	252			No
Fruiting habit	Total Number of Nodes (TN)	TN	AZ7	D11	qTN-AZ7-1	Arizona	c4_18678-c4_38231	104.27	c4_13985	83.37-104.8	16,210,907-7,839,868	10421827	659	4.38	3.59	82.55-104.27	-2.06	-0.7	0.34	PD	11.56	Tx2094	252			No
Fruiting habit	Total Number of Non-Fruiting Branches (TNFB)	TNFB	IA24	A01	qTNFB-IA24-1	Iowa	c4_26482-c4_127304	49.43	c3_05004	43.36-56.43	93,023,308-5,854,152	65638491	1235	4.14	3.69	39.36-59.43	-1.5	-0.47	0.31	PD	8.89	Tx2094	225			No
Fruiting habit	Total Number of Non-Fruiting Branches (TNFB)	TNFB	AZ15	A11	qTNFB-AZ15-1	Arizona	cs_1288-c4_26580	0.01	cs_1288	0.01-5.01	12,955,059-10,951,928	12955059	121	5.84	3.65	0.01-3.01	-1.15	0.09	0.08	A	9.71	Tx2094	249			No
Fruiting habit	Total Number of Non-Fruiting Branches (TNFB)	TNFB	IA27	D05	qTNFB-IA27-1	Iowa	c4_09461-c4_131801	61.46	c4_09461	52.46-74.34	9,093,352-2,523,538	9093352	780	4.33	3.69	48.46-73.46	-1.32	-1.03	0.79	PD	10.31	Tx2094	225			No
Phenology	Total Number of Green Bolls Retained after 30 Days + 4 Week Interval (GB)	GB	AZ8	A11	qGB-AZ8-1	Arizona	GS1_39607p88q23-EST1D_07319_01_230	9.87	GS1_39607p88q23	8.87-11.87	1,912,510-4,371,131	1912510	260	3.75	3.71	2.87-15.87	-0.53	-0.97	1.83	OD	9.52	Tx2094	243			No
Phenology	Total Number of Green Bolls Retained after 30 Days + 4 Week Interval (GB)	GB	AZ9	D08	qGB-AZ9-1	Arizona	EST2_18036_01-c2_04080	19.71	GS1D_51879p342q31	8.01-25.35	2,309,559-13,256,767	5025252	589	4.8	3.71	8.01-25.35	0.65	-0.87	1.33	OD	8.94	Acala Maxxa	243	Cluster 8		No
Phenology	Total Number of Fruiting Branches at First Flower (FBFF)	FBFF	IA24	A01	qFBFF-IA24-1	Iowa	c4_10335-c3_05004	26.65	c4_77850	19.18-44.23	17,216,853-65,638,491	65663929	485	5.11	3.76	19.18-28.66	-1.53	2.04	1.33	OD	8.74	Tx2094	222			No
Phenology	Total Number of Fruiting Branches at First Flower (FBFF)	FBFF	IA27	D05	qFBFF-IA27-1	Iowa	c4_06690-GS1D_23044p418q14	0.01	c4_06690	0.01-11.79	18,861,200-15,583,214	18861200	357	4.79	3.76	0.01-11.79	-2.08	-2.07	1	D	14.85	Tx2094	222			No
Phenology	Total Number of Fruiting Branches at First Flower (FBFF)	FBFF	IA9	D13	qFBFF-IA9-1	Iowa	c2_79759-c2_58393	33.04	c2_56351	29.04-34.65	35,245,135-58,115,513	53769852	741	4.03	3.76	23.57-34.04	-1.86	0.28	0.15	A	7.89	Tx2094	222			No
Phenology	Total Number of Nodes at First Flower (TNFF)	TNFF	IA24	A01	qTNFF-IA24-1	Iowa	c4_66700-c4_73990	26.65	c4_77850	25.75-27.94	17,216,853*-91,683,592	65663929	714	3.98	3.78	20.18-28.66	-1.19	1.46	1.23	OD	6.82	Tx2094	222			No
Phenology	Total Number of Nodes at First Flower (TNFF)	TNFF	IA9	D13	qTNFF-IA9-1	Iowa	c2_56351-c2_58393	34.04	c2_56351	33.04-34.65	53,769,852-58,115,513	53769852	230	4.09	3.78	31.04-34.04	-1.61	-0.34	0.21	PD	7.73	Tx2094	222			No
Plant architecture	Average Stem Pubescence (SP)	SP	AZ5	A06	qSP-AZ5-1	Arizona	GS1A_14865p560q19-c4_09782	17.84	c4_07635	5.72-28.99	17,155,477-115,638,266	96619390	994	72.39	3.9	17.46-18.1	1.48	0.15	0.1	A	71.49	Acala Maxxa	252	Cluster 1		Yes
Plant architecture	Average Stem Pubescence (SP)	SP	IA6	A06	qSP-IA6-1	Iowa	GS1A_14865p560q19-EST1A_111998	11.14	c2_56561	0.01-22.9	17,155,477-56,018,324	100611378	413	43.49	5.22	10-12.14	1.2	0.02	0.01	A	48.49	Acala Maxxa	231	Cluster 1		Yes
Plant architecture	Average Stem Pubescence (SP)	SP	AZ3	A12	qSP-AZ3-1	Arizona	GS2A_37259p664q5-c4_63363	0.01	GS2A_37259p664q5	0.01-7.34	89,388,596-97,753,090	89388596	532	4.57	3.9	0.01-9.34	0.22	-0.12	0.52	PD	2.29	Acala Maxxa	252			No
Plant architecture	Average Stem Pubescence (SP)	SP	IA8	A13	qSP-IA8-1	Iowa	GS1A_34972p1090q20-ck_24841	22.01	ck_58314	13.01-32.2	3,404,007-63,541,501	57791457	759	5.94	5.22	11.01-33.51	-0.43	0.15	0.36	PD	5.81	Tx2094	231			No
Plant architecture	Average Stem Pubescence (SP)	SP	AZ31	D06	qSP-AZ31-1	Arizona	EST1D_09108_01-EST1D_42236	29.14	c4_65202	19.09-34.86	63,103,230-55,693,362*	57362695	300	8.29	3.9	24.09-32.14	0.33	-0.09	0.28	PD	4.17	Acala Maxxa	252			Yes
Plant architecture	Average Stem Pubescence (SP)	SP	IA31	D06	qSP-IA31-1	Iowa	EST1D_42236-EST1D_14_1412	45.29	EST1D_42236	39.29-45.72	57,362,695*-59,393,324	Unknown	94	14.64	5.22	43.29-45.29	0.61	0.2	0.33	PD	12.47	Acala Maxxa	231			Yes
Plant architecture	Branch Angle of 5th Sympodium (BA; °)	BA	AZ13	D01	qBA-AZ13-1	Arizona	GS1D_42198p123q14-c2_114573	3.27	c4_68957	1.82-4.27	18,992,271-18,196,452	23137072	29	3.79	3.58	0.01-16.18	2.34	-0.74	0.32	PD	6.74	Acala Maxxa	240	Cluster 7		No
Plant architecture	Fruiting Branch Length for 1st Branch (FB1; mm)	FB1	IA31	D06	qFB1-IA31-1	Iowa	EST1D_18263-c4_10294	21.31	EST1D_09108_01	12.58-25.31	65,851,264-59,056,448	63103230	364	4.05	3.89	9.99-29.31	0.44	-0.8	1.79	OD	7.88	Acala Maxxa	220			No
Plant architecture	Fruiting Branch Length for 1st Branch (FB1; mm)	FB1	IA30	D10	qFB1-IA30-1	Iowa	GS1D_35377p470q22-ck_01124	6.01	GS1D_35377p470q22	4.01-9.01	62,550,932-56,943,517	62550932	264	4.05	3.89	0.01-12.01	0.13	1.26	9.64	OD	12.33	Acala Maxxa	220			No
Plant architecture	Fruiting Branch Length for 3rd Branch (FB2; mm)	FB2	AZ30	A01	qFB2-AZ30-1	Arizona	c4_78149-c4_10335	21.47	c4_48693	11.01-30.97	100,276,588-17,216,853	Unknown	1061	4.33	3.59	8.01-31.97	13.11	-6.79	0.52	PD	8.18	Acala Maxxa	241	Cluster 4		No
Plant architecture	Fruiting Branch Length for 3rd Branch (FB2; mm)	FB2	AZ15	A11	qFB2-AZ15-1	Arizona	EST1A_22580-c4_110219	45.12	EST1A_22580	45.12-45.97	66,564,698*-94,722,588	Unknown	224	3.66	3.59	44.33-45.97	-4.68	-16.35	3.49	OD	6.59	Tx2094	241			No
Plant architecture	Ratio of PH to FB1 (PHFB1)	PHFB1	AZ20	D09	qPHFB1-AZ20-1	Arizona	c3_66591-ck_77717	26.97	c4_101926	26.03-27.97	35,133,574-29,614,432	38621634	272	5.51	4.95	24.03-28.97	15.64	-12.4	0.79	PD	10.49	Acala Maxxa	240			No
Plant architecture	Ratio of PH to FB2 (PHFB2)	PHFB2	AZ8	A11	qPHFB2-AZ8-1	Arizona	GS1_39607p88q23-EST1D_07319_01_230	12.87	GS1_39607p88q23	8.87-16.36	1,912,510-4,371,131	1912510	260	3.92	3.79	1.01-15.87	-1.44	-0.19	0.13	A	8.42	Tx2094	238			No
Plant architecture	Plant Height (PH; mm)	PH	AZ21	D07	qPH-AZ21-1	Arizona	c4_16632-c2_14514	10.24	GS1_41582p272q16	6.41-15.24	46,471,967-22,166,613	28617210	491	4.29	3.75	0.01-17.15	-110.67	-1.58	0.01	A	7.22	Tx2094	250			No
Seed	50 Fuzzy Seed Weight (FSW; g)	FSW	AZ30	A01	qFSW-AZ30-1	Arizona	c2_38857-EST1A_32413_01	30.97	c4_10335	22.2-37.21	65,148,434-12,467,101	17216853	641	6.32	3.69	23.97-35.21	0.22	-0.07	0.32	PD	8.66	Acala Maxxa	248	Cluster 4		Yes
Seed	50 Fuzzy Seed Weight (FSW; g)	FSW	IA24	A01	qFSW-IA24-1	Iowa	c3_05004-EST1A_32413_01	62.43	c4_127304	60.43-64.44	65,638,491-12,467,101	5854152	643	3.94	3.83	52.43-79.13	0.22	0.04	0.19	A	8.43	Acala Maxxa	223			Yes
Seed	50 Fuzzy Seed Weight (FSW; g)	FSW	AZ11	A05	qFSW-AZ11-1	Arizona	GS1_48876p1060q15-GS2D_4259p2093q25	16.22	c4_36190	6.93-19.23	17,185,964-12,695,737	12447798	442	5.08	3.69	6.01-19.12	0.21	-0.01	0.04	A	7.19	Acala Maxxa	248			No
Seed	50 Fuzzy Seed Weight (FSW; g)	FSW	AZ16	A07	qFSW-AZ16-1	Arizona	c4_32659-EST2_39330	17.01	c4_49169	5.25-25.72	24,309,913-80,660,496*	88161608	604	7.41	3.69	15.64-18.72	0.23	0.07	0.31	PD	9.92	Acala Maxxa	248			No
Seed	50 Fuzzy Seed Weight (FSW; g)	FSW	AZ3	A12	qFSW-AZ3-1	Arizona	GS2A_37259p664q5-c4_63363	4.34	c3_13858	1.01-11.34	89,388,596-97,753,090	77411923	532	4.3	3.69	0.01-12.34	0.07	-0.25	3.84	OD	6.75	Acala Maxxa	248			No
Seed	50 Fuzzy Seed Weight (FSW; g)	FSW	AZ32	D10	qFSW-AZ32-1	Arizona	c4_68073-c4_06280	0.01	c4_68073	0.01-2.92	13,976,894-25,433,293	13976894	345	4.13	3.69	0.01-3.92	0.18	0.01	0.03	A	5.69	Acala Maxxa	248			No
Seed	50 Fuzzy Seed Weight (FSW; g)	FSW	AZ26	D13	qFSW-AZ26-1	Arizona	c3_01023-c4_63317	7.73	c4_39365	3.34-11.73	17,703,717-52,788,761	41704276	700	4.16	3.69	0.01-14.68	0.18	-0.08	0.43	PD	5.61	Acala Maxxa	248	Cluster 11		No
Seed	50 Seed Weight (SW; g)	SW	AZ30	A01	qSW-AZ30-1	Arizona	c4_08921-c4_10335	25.97	c4_73990	21.93-31.97	61,822,969-17,216,853	91683592	457	4.08	3.75	17.78-34.21	0.15	-0.05	0.36	PD	5.81	Acala Maxxa	248	Cluster 4		No
Seed	50 Seed Weight (SW; g)	SW	AZ16	A07	qSW-AZ16-1	Arizona	c4_32659-GS1A_23155p1125q16	18.01	c4_04889	5.25-27.05	24,309,913-7,321,899	80660496	657	8.69	3.75	15.64-21.72	0.24	0	0.01	A	12.87	Acala Maxxa	248			No
Seed	50 Seed Weight (SW; g)	SW	IA22	A07	qSW-IA22-1	Iowa	EST2_39330-GS1A_23155p1125q16	94.82	c2_11322	93.54-97.82	20,614,871*-7,321,899	18377612	541	3.75	3.71	78.27-103.82	0.18	0.11	0.61	PD	8.43	Acala Maxxa	223			No
Seed	Average Boll Weight (BW; g; 5 Bolls)	BW	IA33	D02	qBW-IA33-1	Iowa	GS2D_35199p530q21-c4_28721	2.01	GS2D_35199p530q21	0.01-12.74	59,849,786-15,109,747	59849786	781	4.92	3.68	0.01-11.74	0.3	0.1	0.33	PD	8.65	Acala Maxxa	230			No
Seed	Average Number of Locules (AL; 5 Bolls)	AL	AZ12	D05	qAL-AZ12-1	Arizona	EST2D_20572-c4_09461	105.44	c2_04598	85.33-112.44	21,529,953-9,093,352	14681025	1248	4.22	3.7	99.24-115.44	-0.13	-0.13	0.98	D	8.1	Tx2094	246			No
Seed	Average Number of Locules (AL; 5 Bolls)	AL	IA30	D10	qAL-IA30-1	Iowa	c4_35467-c4_47698	37.77	c4_38839	36.73-40.38	60,976,147-47,388,641	22991955	492	4.08	3.7	34.73-41.38	-0.01	0.17	30.93	OD	6.86	Tx2094	230	Cluster 9		No
Seed	Average Seeded Cotton Weight (SCW; g; 5 Bolls)	SCW	AZ25	A02	qSCW-AZ25-1	Arizona	ck_09867-c4_54340	53.06	c2_39361	41.95-68.89	3,870,558-84,855,696	9133383	1107	5.49	3.72	49.02-57.06	0.2	0.04	0.2	PD	8.65	Acala Maxxa	243			No
Seed	Average Seeded Cotton Weight (SCW; g; 5 Bolls)	SCW	AZ11	A05	qSCW-AZ11-1	Arizona	GS1_48876p1060q15-GS2D_4259p2093q25	19.12	c4_36190	6.93-19.23	17,185,964-12,695,737	12447798	442	6.56	3.72	14.22-19.12	0.22	-0.03	0.14	A	9.85	Acala Maxxa	243			No
Seed	Average Seeded Cotton Weight (SCW; g; 5 Bolls)	SCW	IA33	D02	qSCW-IA33-1	Iowa	GS2D_35199p530q21-c4_28721	3.01	c3_96157	0.01-8.74	59,849,786-15,109,747	12742894	781	4.2	3.74	0.01-12.74	0.23	0.05	0.23	PD	7.22	Acala Maxxa	230			No
¹Trait abbreviations as used in Tables 1 and 3.
²Chromosome designation. A and D represents the A- and D- subgenome, respectively.
³QTL name is provided as follows: the first two to four letters excluding “q” indicate the abbreviated trait name, following by linkage group (LG). The last letter indicates the population in which the QTL was detected; IA, Iowa; AZ, Arizona.
⁴Genetic marker that is closest to the peak position of a QTL.
⁵Genetic positions where the LOD value dropped below the threshold for a QTL interval.
⁶Additive (A) effect when substituting a TX2094 allele with an allele from Acala Maxxa at the QTL. The effect of the Acala Maxxa allele relative to the TX2094 allele at each QTL indicates the sign (positive or negative) of the allelic effect.
⁷|dominance effect/additive effect|
⁸A, additive (|d/a| = 0-0.2); PD, partial dominance (|d/a| = 0.21-0.8); D, dominance (|d/a| = 0.81-1.2); OD, overdominance (|d/a| >1.2).
⁹Percentage of phenotypic variance explained by each QTL.
¹⁰Parent with the positive additive allelic effect.
¹¹Number of individuals with a scored phenotype used for QTL analysis.
¹²A QTL cluster is defined where four or more QTL of different trait categories were identified within a 20 cM region.
¹³A QTL hotspot is defined where four or more QTL of the same trait category were identified within a 20 cM region.
¹⁴Indicator of coincident QTL between subpopulations for each trait. Yes, QTL identified in both subpopulations; No, QTL identified in only one of the two subpopulations.
